# Supplementary material for: Awareness of predatory journals and open access among medical oncologists: results of an online survey
Source: PubMed Central journal article supplement — ESMO Open. 2019 Nov 27;4(6):e000580. doi: 10.1136/esmoopen-2019-000580 (PMC6890386; doi:10.1136/esmoopen-2019-000580), 2019-11-27
Supplement: esmoopen-2019-000580supp001.pdf [file esmoopen-2019-000580supp001.pdf]

Dear colleague, the Medical University of Vienna would like to investigate the knowledge about publishing and predatory journals. Therefore, we would like to encourage you to take this short questionnaire. If you have any questions, please contact Dr. Berghoff (Department of Medicine I, Medical University of Vienna) Email: [anna.berghoff@meduniwien.ac.at](mailto:anna.berghoff@meduniwien.ac.at) or call 01-40400-44570.

**Thank you for your cooperation!**

|                                                                                                                                                              |                                                                                                                                                                                          |
|--------------------------------------------------------------------------------------------------------------------------------------------------------------|------------------------------------------------------------------------------------------------------------------------------------------------------------------------------------------|
| Age _____ Gender <input type="checkbox"/> male <input type="checkbox"/> female                                                                               |                                                                                                                                                                                          |
| Level of education                                                                                                                                           | <input type="checkbox"/> Resident <input type="checkbox"/> Specialist registrar <input type="checkbox"/> Consultant <input type="checkbox"/> Lecturer <input type="checkbox"/> Professor |
| Main occupation                                                                                                                                              | <input type="checkbox"/> Registered doctor in private practice <input type="checkbox"/> Hospital <input type="checkbox"/> University hospital                                            |
| Do you read scientific literature? (Original Articles, Reviews, ...) <input type="checkbox"/> Yes <input type="checkbox"/> No                                |                                                                                                                                                                                          |
| <b>If yes</b> , which type of media do you use? ( <i>Multiple answers possible</i> )                                                                         |                                                                                                                                                                                          |
| <input type="checkbox"/> Pubmed/Medline <input type="checkbox"/> German institute for medical documentation and information                                  |                                                                                                                                                                                          |
| <input type="checkbox"/> Journal-Newsfeed <input type="checkbox"/> OncLive <input type="checkbox"/> Scientific online platforms                              |                                                                                                                                                                                          |
| <input type="checkbox"/> Textbooks <input type="checkbox"/> UpToDate                                                                                         |                                                                                                                                                                                          |
| <input type="checkbox"/> Others: _____                                                                                                                       |                                                                                                                                                                                          |
| <b>If yes</b> , do such articles influence your diagnostic/therapeutic decisions?                                                                            |                                                                                                                                                                                          |
| <input type="checkbox"/> Yes <input type="checkbox"/> No                                                                                                     |                                                                                                                                                                                          |
| Do you have scientific experience? <input type="checkbox"/> Yes <input type="checkbox"/> No                                                                  |                                                                                                                                                                                          |
| <b>If yes, in which form?</b> ( <i>Multiple answers possible</i> )                                                                                           |                                                                                                                                                                                          |
| <input type="checkbox"/> Writing of publications <input type="checkbox"/> Editor <input type="checkbox"/> Reviewer for one or more journals                  |                                                                                                                                                                                          |
| - How many publications did you author as <b>first</b> or <b>last</b> author?                                                                                |                                                                                                                                                                                          |
| <input type="checkbox"/> < 10 Publications <input type="checkbox"/> 11 – 100 Publications <input type="checkbox"/> > 100 Publications                        |                                                                                                                                                                                          |
| - Did you publish any top publications in your field? (Top 20% journals within a specific field):                                                            |                                                                                                                                                                                          |
| <input type="checkbox"/> Yes <input type="checkbox"/> No                                                                                                     |                                                                                                                                                                                          |
| - How many publications did you co-author?                                                                                                                   |                                                                                                                                                                                          |
| <input type="checkbox"/> < 10 Publications <input type="checkbox"/> 11 – 100 Publications <input type="checkbox"/> > 100 Publications                        |                                                                                                                                                                                          |
| - Are you listed as <b>Corresponding-Author</b> in one of your publications?                                                                                 |                                                                                                                                                                                          |
| <input type="checkbox"/> Yes <input type="checkbox"/> No                                                                                                     |                                                                                                                                                                                          |
| ↳ <b>If yes</b> , how often? <input type="checkbox"/> 1 - 10 <input type="checkbox"/> 11 – 20 <input type="checkbox"/> 21 – 50 <input type="checkbox"/> > 50 |                                                                                                                                                                                          |
| Are you scientifically active <u>at the moment</u> ? <input type="checkbox"/> Yes <input type="checkbox"/> No                                                |                                                                                                                                                                                          |
| Which are most important for you if considering a specific journal for publication of your scientific work? ( <i>Multiple answers possible</i> )             |                                                                                                                                                                                          |
| <input type="checkbox"/> Press work                                                                                                                          |                                                                                                                                                                                          |
| <input type="checkbox"/> Rapid publication process                                                                                                           |                                                                                                                                                                                          |
| <input type="checkbox"/> High Impact Factor                                                                                                                  |                                                                                                                                                                                          |
| <input type="checkbox"/> Peer-Review                                                                                                                         |                                                                                                                                                                                          |
| <input type="checkbox"/> Prestigious Editorial Board                                                                                                         |                                                                                                                                                                                          |
| <input type="checkbox"/> No publications costs                                                                                                               |                                                                                                                                                                                          |
| <input type="checkbox"/> Good Editorial Support                                                                                                              |                                                                                                                                                                                          |
| <input type="checkbox"/> Good Indexing (Pubmed, PMC, ...)                                                                                                    |                                                                                                                                                                                          |
| <input type="checkbox"/> I don't publish anything                                                                                                            |                                                                                                                                                                                          |
| <input type="checkbox"/> others: _____                                                                                                                       |                                                                                                                                                                                          |
| How would you grade the reliability of a specific scientific journal? ( <i>Multiple answers possible</i> )                                                   |                                                                                                                                                                                          |
| <input type="checkbox"/> Assessment of the editorial board                                                                                                   |                                                                                                                                                                                          |
| <input type="checkbox"/> Indexing of the journal (Pubmed, Web of Science, ...)                                                                               |                                                                                                                                                                                          |
| <input type="checkbox"/> Impact Factor of the journal                                                                                                        |                                                                                                                                                                                          |
| <input type="checkbox"/> Prominence of the Editor in Chief                                                                                                   |                                                                                                                                                                                          |
| <input type="checkbox"/> Cooperation with international organizations/societies                                                                              |                                                                                                                                                                                          |
| <input type="checkbox"/> Layout of the journal                                                                                                               |                                                                                                                                                                                          |
| <input type="checkbox"/> Localization of the Editorial Office                                                                                                |                                                                                                                                                                                          |
| <input type="checkbox"/> Publishing experiences of other colleagues                                                                                          |                                                                                                                                                                                          |
| <input type="checkbox"/> Publisher                                                                                                                           |                                                                                                                                                                                          |
| <input type="checkbox"/> Amount of publication costs                                                                                                         |                                                                                                                                                                                          |
| <input type="checkbox"/> Further information on the peer-review process                                                                                      |                                                                                                                                                                                          |
| <input type="checkbox"/> Third party experience (e.g. Blog entries/Google entries)                                                                           |                                                                                                                                                                                          |
| <input type="checkbox"/> Quality of the submission system                                                                                                    |                                                                                                                                                                                          |
| <input type="checkbox"/> Scope of the journal                                                                                                                |                                                                                                                                                                                          |
| <input type="checkbox"/> Internet presence of the journal                                                                                                    |                                                                                                                                                                                          |

|                                                                                                                                                                                                                                                                                                                                                                                                                                                                                                                                                                                                                                                                       |
|-----------------------------------------------------------------------------------------------------------------------------------------------------------------------------------------------------------------------------------------------------------------------------------------------------------------------------------------------------------------------------------------------------------------------------------------------------------------------------------------------------------------------------------------------------------------------------------------------------------------------------------------------------------------------|
| <input type="checkbox"/> others: _____                                                                                                                                                                                                                                                                                                                                                                                                                                                                                                                                                                                                                                |
| Do you know the „Open Access“ system?<br><input type="checkbox"/> Yes <input type="checkbox"/> No<br>↳ <b>If yes</b> , did you publish anything in an Open Access Journal yet?<br><input type="checkbox"/> Yes <input type="checkbox"/> No <input type="checkbox"/> Don't know <input type="checkbox"/> Did not publish anything                                                                                                                                                                                                                                                                                                                                      |
| Why would publish your work in an Open Access Journal? ( <i>Multiple answers possible</i> )<br><input type="checkbox"/> High visibility<br><input type="checkbox"/> Promotion of the results over social media<br><input type="checkbox"/> Fast publication process<br><input type="checkbox"/> Prestigious journal<br><input type="checkbox"/> As opportunity to publish „negative“ results<br><input type="checkbox"/> Less strict peer review process<br><input type="checkbox"/> Will not publish anything in an open access journal<br><input type="checkbox"/> others: _____                                                                                    |
| How much would be willing to pay for a publication in an open access journal?<br><input type="checkbox"/> 0 – 100 € <input type="checkbox"/> 101 – 300 € <input type="checkbox"/> 301 – 500 € <input type="checkbox"/> 501 – 700 € <input type="checkbox"/> 701 -1000 €<br><input type="checkbox"/> 1001 – 1500 € <input type="checkbox"/> 1501 – 2000 € <input type="checkbox"/> 2001 – 3000 € <input type="checkbox"/> 3001 – 4000 € <input type="checkbox"/> > 4000 €<br><input type="checkbox"/> Did not plan to publish anything <input type="checkbox"/> others: _____                                                                                          |
| Do you know the term „Predatory journals“? <input type="checkbox"/> Yes <input type="checkbox"/> No<br>↳ <b>If yes</b> , where from? ( <i>Multiple answers possible</i> )<br><input type="checkbox"/> Scientific Literature <input type="checkbox"/> Friends/Colleagues <input type="checkbox"/> Emails <input type="checkbox"/> Congress <input type="checkbox"/> Media (incl. Social Media)                                                                                                                                                                                                                                                                         |
| Do you know how to identify a potentially “Predatory Journal”?<br><input type="checkbox"/> Yes <input type="checkbox"/> No                                                                                                                                                                                                                                                                                                                                                                                                                                                                                                                                            |
| How would you characterize a „Predatory Journal“? ( <i>Multiple answers possible</i> )<br><input type="checkbox"/> No Impact Factor<br><input type="checkbox"/> Open Access to all articles<br><input type="checkbox"/> Low quality of the published articles<br><input type="checkbox"/> No or insufficient peer review<br><input type="checkbox"/> No Editorial Board or no real persons at the editorial board<br><input type="checkbox"/> Journal is located in a newly industrializing country<br><input type="checkbox"/> Unprofessional journal layout<br><input type="checkbox"/> High publication fees<br><input type="checkbox"/> Rapid publication process |
| Were you confronted with scientific literature/studies by patients?<br><input type="checkbox"/> Yes <input type="checkbox"/> No<br>↳ <b>If yes</b> , were any of the articles published in a „Predatory Journals“?<br><input type="checkbox"/> Yes <input type="checkbox"/> No <input type="checkbox"/> Don't know                                                                                                                                                                                                                                                                                                                                                    |
| Are you aware of the <i>Beall's List</i> ?<br><input type="checkbox"/> Yes <input type="checkbox"/> No<br>↳ <b>If yes</b> , did you already actively use Beall's list to see if an unknown journal is a “predatory” journal?<br><input type="checkbox"/> Yes <input type="checkbox"/> No                                                                                                                                                                                                                                                                                                                                                                              |
| Do you receive invitations by journals to contribute an article? (Orig. Article, Review, Research Letter, ...)<br><input type="checkbox"/> Yes <input type="checkbox"/> No<br>↳ <b>If yes</b> , How many invitations do you receive <u>each month</u> ?<br><input type="checkbox"/> 1 - 10 <input type="checkbox"/> 11 – 50 <input type="checkbox"/> 51 – 100 <input type="checkbox"/> > 100<br>↳ <b>If yes</b> , are any of these – as far as you aware of – from a „Predatory Journal“?<br><input type="checkbox"/> Yes <input type="checkbox"/> No <input type="checkbox"/> Don't know                                                                             |

Version 1; 07.10.2018
